# Supplementary material
Source: PubMed Central journal article supplement (PMC3964110)
Supplement: 1316569111_pnas.201316569SI.pdf [file 1316569111_pnas.201316569SI.pdf]

# Supporting Information

Zhu et al. 10.1073/pnas.1316569111

## SI Materials and Methods

**Cultivation of *Acinetobacter baumannii* ATCC19606 and Mutants.** Either a defined medium or Luria broth (LB) was used to cultivate the wild-type or the mutants ( $\Delta cntA::aacCI$ ,  $\Delta cntB::aacCI$ ). The defined medium contained  $\text{NH}_4\text{Cl}$  (1 g/L<sup>-1</sup>),  $\text{NaCl}$  (0.5 g/L<sup>-1</sup>),  $\text{KH}_2\text{PO}_4$  (3 g/L<sup>-1</sup>),  $\text{Na}_2\text{HPO}_4 \cdot 7\text{H}_2\text{O}$  (12.8 g/L<sup>-1</sup>),  $\text{MgSO}_4 \cdot 7\text{H}_2\text{O}$  (0.5 g/L<sup>-1</sup>),  $\text{CaCl}_2 \cdot 2\text{H}_2\text{O}$  (0.15 g/L<sup>-1</sup>),  $\text{Na}_2\text{MoO}_4 \cdot 2\text{H}_2\text{O}$  (0.5 mg/L<sup>-1</sup>),  $\text{FeCl}_3$  (50  $\mu\text{M}$ ), and a mix of the following vitamins or supplements, including biotin (0.4 mg/L<sup>-1</sup>), folic acid (0.4 mg/L<sup>-1</sup>), pyridoxine hydrochloride (2 mg/L<sup>-1</sup>), thiamine hydrochloride (1 mg/L<sup>-1</sup>), riboflavin (1 mg/L<sup>-1</sup>), nicotinic acid (1 mg/L<sup>-1</sup>), pantothenic acid (1 mg/L<sup>-1</sup>), vitamin B<sub>12</sub> (20 mg/L<sup>-1</sup>), 4-aminobenzoic acid (1 mg/L<sup>-1</sup>), and lipoic acid (1 mg/L<sup>-1</sup>). The LB medium contained tryptone (10 g/L<sup>-1</sup>), yeast extract (5 g/L<sup>-1</sup>), and  $\text{NaCl}$  (5 g/L<sup>-1</sup>), and the pH was adjusted using  $\text{NaOH}$  (0.2  $\mu\text{M}$ ). Luria agar (LA) was made as LB and agar was added (15 g/L<sup>-1</sup>).

**Growth Curves of *A. baumannii* and the Mutants on Carnitine or Succinate.** To characterize growth of the ATCC 19606 wild-type strain (*Salmonella* Genetic Stock Centre, University of Calgary, Calgary, Canada) and the mutants, carnitine, or succinate was added to the defined medium to a final concentration of 20 mM as the sole carbon and energy sources. The wild-type strain and the mutants were cultivated in 5 mL LB for 8 h at 37 °C while shaking (200 rpm). The cultures were then diluted 1:50 to inoculate the defined medium containing 20 mM succinate. These cultures were then incubated at 37 °C for 15–16 h and the pellet was collected by centrifugation at 3,000  $\times g$  for 10 min. Cell pellets were then washed twice with sterile distilled water and resuspended in 5 mL of water. Finally, 5 mL of the defined medium with either succinate or carnitine was inoculated with 100  $\mu\text{L}$  of washed culture and distributed into eight wells each in a 96-well tissue culture plate (sterile, F-bottom, with lid; Cellstar, Greiner bio-one), which was then incubated at 37 °C and the optical density at 600 nm was recorded every 10 min using a Multiskan GO spectrophotometer (Thermo Scientific).

**Cultivation of *A. baumannii* and the Mutants for the Quantification of Trimethylamine and Carnitine by Ion Chromatography.** To quantify the production of trimethylamine (TMA) in the wild-type and the mutants, cultures were set up in triplicate in Corning cell culture flasks (surface area 75 cm<sup>2</sup>) with 50 mL of the defined medium supplemented with both carnitine (20 mM) and succinate (20 mM). Inoculum was prepared as described above. The flasks were incubated vertically at 37 °C while shaking continuously (200 rpm). A 2-mL sample was taken from each flask at  $t = 0, 4, 8, 12,$  and 24 h. Optical density at 600 nm was recorded immediately for every sample at each time point. The samples were then passed through 0.22- $\mu\text{m}$  filters to remove microbial cells and the supernatants were diluted 1:10 in double distilled water, which was then quantified for TMA and carnitine using a cation-exchange ion chromatography (Metrohm 881 Compact IC Pro) equipped with a Metrosep C4/250 mm separation column and a conductivity detector (Metrohm).

**Marker-Exchange Mutagenesis of *cntA* and *cntB*.** To obtain targeted deletion of *cntA* and *cntB* in *A. baumannii* ATCC 19606, we used the mutagenesis strategy developed by van Aartsen and Rajakumar (1), requiring the creation of a suicide plasmid containing the upstream and the downstream flanking regions of the targeted gene separated by a gentamicin antibiotic cassette, followed by transfer of the construct to *A. baumannii*.

Upstream and downstream flanking regions of *cntA* or *cntB* (~1 kb) were amplified from the genomic DNA of ATCC 19606 using primers indicated in Table S5 and the gentamicin-resistant gene cassette (*aacCI*) was amplified from pUC18R6K-mini-Tn7T-Gm (2). PCR amplification was performed using Phusion High-Fidelity DNA Polymerase (Thermo Scientific) according to manufacturer's specifications. To join upstream and downstream flanking regions with the gentamicin-resistant gene cassette, spliced overlap extension-PCR (SOE-PCR) was performed (3) using KOD Hot Start DNA Polymerase (Merck). Ten nanograms of each flanking region and the gentamicin-resistant gene cassette were mixed and used as the template. SOE-PCR was run without primers for five cycles and then for 30 cycles after the primers were added (PR2768 and PR2771 for *cntA*; PR2774 and PR2777 for *cntB*) to generate a ~3-kb PCR product. Both SOE-PCR products and the vector (pJTOOL-3) were digested with NotI (New England Biolabs) for 4 h at 37 °C and the bands were purified from an agarose gel. Ligation was performed using T4 DNA ligase (Promega) using 50 ng of digested vector and 2:1 for *cntA* or 4:1 for *cntB* insert:vector molar ratio. Ligation was carried out for 7 h at 15 °C and 10  $\mu\text{L}$  of ligation mix was transformed into chemically competent *Escherichia coli* CC118 $\lambda\text{pir}$ , which was selected on LA with 30  $\mu\text{g}/\text{mL}^{-1}$  chloramphenicol and 15  $\mu\text{g}/\text{mL}^{-1}$  gentamicin. Plasmids with insert were selected and tested by digestion to confirm the presence and the orientation of the insert. Finally, selected plasmids were transferred to chemically competent *E. coli* S17- $\lambda\text{pir}$ .

Conjugation was used to efficiently transfer the suicide plasmid to ATCC 19606. The donor *E. coli* strains and the recipient *A. baumannii* strain ATCC 19606 were grown overnight in LB and 100  $\mu\text{L}$  were used to inoculate 10 mL LB. Optical density at 600 nm was measured at regular intervals and growth was suspended when OD<sub>600</sub> reached 0.3 ~ 0.4. Bacterial culture (5 mL) were collected by centrifugation at 3,000  $\times g$  for 10 min and washed with 1 mL LB twice and resuspended in 1 mL LB after the final wash. Next, 200  $\mu\text{L}$  of donor strains were mixed with 200  $\mu\text{L}$  of the recipient, centrifuged at 16,000  $\times g$  for 2 min, resuspended with 100  $\mu\text{L}$  of 10% (wt/vol) sterile glycerol, spread on LA, and incubated at 37 °C for 24 h. Bacterial cultures were collected in 1 mL of 10% (wt/vol) glycerol, serially diluted, and plated on Simmons citrate agar (Oxoid) with 80  $\mu\text{g}/\text{mL}^{-1}$  gentamicin. Selected colonies were screened using colony-PCR to detect the insertion of the suicide plasmid at either the upstream flanking region or the downstream flanking region. Selection for double-crossover deletion mutants and the loss of plasmid backbone were carried out by sucrose counter selection because of the presence of a *sacB* gene. Single crossover mutants were cultivated in LB medium overnight and plated out on LA with 6% sucrose, which was subsequently incubated overnight at 37 °C. Screen for double-crossover deletion mutants was carried out by colony PCR. Primers used for screening are listed in Table S5.

**Complementation of the  $\Delta cntA$  and  $\Delta cntB$  Mutants of *A. baumannii*.** An ~7.8-kb DNA fragment comprising the carnitine oxygenase/reductase gene cluster (Fig. 1C) was amplified from the genomic DNA of strain ATCC 19606 using the primers PR3103/PR3104 (Table S5) with a proofreading DNA polymerase (Phusion High-Fidelity DNA polymerase, Thermo Scientific). The PCR product was A-tailed using the GoTaq Polymerase (Promega), purified and cloned into the pGEM-Teasy cloning vector (Promega). The insert was amplified from vector pGEM-Teasy using the primers PR3120/PR3121 with the Phusion High-Fidelity DNA

Polymerase (Thermo Scientific), and the PCR product (30  $\mu\text{g}$ ) was subsequently digested with BamHI-HF (New England Biolabs) and KpnI-HF (New England Biolabs) for 4 h at 37 °C. The digested product was run in a 1% (wt/vol) agarose gel and the ~8-kb band was excised from the gel and purified. The pMQ300 vector (4) was prepared similarly by digesting 5  $\mu\text{g}$  of the vector followed by gel purification. Thirty-five nanograms of the purified pMQ300 vector were ligated with the gel-purified insert in a 1:1 molar ratio for 6 h at 15 °C using the T4 DNA Ligase (Promega). Ten microliters of the ligation product were chemically transformed into the competent cells of *E. coli* DH5 $\alpha$  and the colonies were selected on LA supplemented with 140  $\mu\text{g}/\text{mL}^{-1}$  hygromycin. The resulting plasmid pKR706, containing the carnitine oxygenase/reductase gene cluster was transferred to chemically competent *E. coli* S17-1 $\lambda\text{pir}$ , which was used as the donor for the conjugation with the  $\Delta\text{cntA}::\text{aacCI}$  and the  $\Delta\text{cntB}::\text{aacCI}$  mutant, respectively. Complemented mutants containing pKR706 were selected on LA plates supplemented with 280  $\mu\text{g}/\text{mL}^{-1}$  hygromycin and 30  $\mu\text{g}/\text{mL}^{-1}$  chloramphenicol.

**Growth of *E. coli* SE11 and *Citrobacter freundii* M3 on Carnitine.** To characterize the growth of these strains on carnitine, the bacteria were inoculated to the defined medium as described above and carnitine was added as the sole carbon and energy source (final concentration, 5 mM), and the cultures were incubated at 37 °C while shaking continuously (200 rpm). Optical density at 600 nm was recorded and 2-mL samples were withdrawn from the culture at 0, 4, 8, 12, and 24 h. The culture supernatant was collected by passing through 0.22- $\mu\text{m}$  filters before quantification for TMA and carnitine by cation-exchange ion chromatography, as described above.

**Heterologous Overexpression of *cntA/cntB*, Site-Directed Mutagenesis and Characterization of the CntA Mutants.** The *cntA* and *cntB* genes were amplified from *A. baumannii* and inserted into the expression vector pCOLADuet-1 (Novagen) under the BamHI/HindIII sites or the vector pET28a (Novagen) under the NdeI/HindIII sites. Coexpression of *cntA/cntB* was achieved by insertion into pCOLADuet-1 under the BamHI/HindIII and the NdeI/KpnI sites, respectively. The CntA mutants (E205D, E205A) were chemically synthesized by GenScript and inserted into the expression vector pET28a under the NdeI/HindIII sites. The resulting plasmids were then transformed into the expression host *E. coli* BLR(DE3) pLysS (Merck Biosciences). For protein overexpression, *E. coli* cells were grown at 37 °C to an OD<sub>600</sub> of 0.5, and isopropyl  $\beta$ -D-1-thiogalactopyranoside (IPTG) was then added to a final concentration of 0.2 mM and the induction of protein expression was then carried out at 18 °C before harvesting. Proteins were purified by His-tag affinity purification from recombinant *E. coli* after induction with IPTG according to the manufacturer's protocol (Merck). The activity of the reconstituted enzyme was assayed at room temperature (~22 °C) by quantifying NADH oxidation and carnitine-dependent TMA production. A 1-mL enzyme assay mixture contained 10 mM Hepes buffer (pH 7.6), 60  $\mu\text{g}$  purified CntA and CntB, respectively, 0.25 mM carnitine, and 0.25 mM NADH. To determine TMA formation from crude extract of recombinant *E. coli* harboring

*cntA*, *cntB* or *cntAB*, 500  $\mu\text{g}$  of cell-free crude extracts were used. Coupling efficiency was determined as the ratio of the total amount of TMA formed to the amount of NADH consumed.

**Substrate Profile of CntAB.** To test the substrate specificity of carnitine oxygenase (CntAB), the enzyme was purified from recombinant *E. coli*. Protein concentrations were quantified by the Bradford method using the Quick Start Bradford Protein Assay Kit (Bio-Rad). The following substrates were purchased from Sigma-Aldrich and tested, including D-, L-carnitine,  $\gamma$ -butyrobetaine, glycine betaine, choline chloride, trimethylamine hydrochloride, and trimethylamine N-oxide. Enzyme activity was assayed at room temperature (~22 °C) by quantifying NADH oxidation. A 1-mL enzyme assay mixture contained 10 mM Hepes buffer (pH 7.6), 60  $\mu\text{g}$  purified CntA and CntB, respectively, 0.25 mM substrate, and 0.25 mM NADH.

**Validation of TMA Production from Carnitine by Gas Chromatography-Mass Spectrometry.** To further confirm the identity of TMA production from carnitine oxidation by CntAB, the enzyme was purified and the activity was reconstituted in vitro by adding CntA and CntB to the enzyme assay as described above. Controls were set up by using CntA or CntB only. The reaction was initiated by adding NADH. The enzyme assay was then incubated at room temperature (~22 °C) for 30 min. The reaction was terminated by adding 0.8 g KOH, and TMA produced from carnitine oxidation was subsequently extracted by toluene as described previously (5). TMA identification was carried out using an Agilent 6890/5973 gas chromatography-mass spectrometry (GC-MS) platform equipped with an automatic liquid sampler. An aliquot (1  $\mu\text{L}$ ) of toluene layer was injected into GC-MS. GC conditions were as follows: column, Agilent HP-5ms capillary column (30 m X 0.25 mm i.d.; film thickness, 0.25  $\mu\text{m}$ ); column temperature, 40 °C for 2.5 min, then the temperature was increased at maximum rate up to 230 °C, followed by 2 min at 230 °C; carrier gas, helium; flow rate, 0.2 mL/min<sup>-1</sup>; split ratio, 10:1.

**Characterization of CntA and the CntA Mutants (E205A, E205D) by Circular Dichroism and Native-PAGE.** Purified recombinant CntA and the mutants were dialyzed against 200 mM sodium phosphate (pH 7.0) containing 200 mM NaCl. Circular dichroism (CD) spectra were recorded in the range of 195–260 nm using a Jasco J-815 spectrometer (Jasco) using a quartz cuvette of 1-mm path length at room temperature (~22 °C). Spectra were collected eight times per sample. Data were expressed as mean residue ellipticity in degrees-cm<sup>2</sup>-dmol<sup>-1</sup>. Spectra were deconvoluted using the online program DICHROWEB (<http://dichroweb.cryst.bbk.ac.uk/html/home.shtml>) (6, 7) and the CDSSTR algorithm was used to estimate the percentages of each secondary structure in CntA and its mutants using the reference protein set 7 (8). Native-PAGE was performed using a NuSep 12% (wt/vol) Tris-glycine precast polyacrylamide gel (NuSep) at a constant voltage (200 V) at 4 °C for 1.5 h with an Invitrogen electrophoresis system. The gels were stained with the Fast Blue reagent (Expedeon). The NativeMark unstained protein standard from Novex was used to estimate the native size of CntA and the mutants.

1. van Aartsen JJ, Rajakumar K (2011) An optimized method for suicide vector-based allelic exchange in *Klebsiella pneumoniae*. *J Microbiol Methods* 86(3):313–319.
2. Choi KH, et al. (2005) A Tn7-based broad-range bacterial cloning and expression system. *Nat Methods* 2(6):443–448.
3. Choi KH, Schweizer HP (2005) An improved method for rapid generation of unmarked *Pseudomonas aeruginosa* deletion mutants. *BMC Microbiol* 5(30):30–41.
4. Kalivoda EJ, et al. (2011) New vector tools with a hygromycin resistance marker for use with opportunistic pathogens. *Mol Biotechnol* 48(1):7–14.
5. daCosta KA, Vrbanc JJ, Zeisel SH (1990) The measurement of dimethylamine, trimethylamine, and trimethylamine N-oxide using capillary gas chromatography-mass spectrometry. *Anal Biochem* 187(2):234–239.

6. Whitmore L, Wallace BA (2004) DICHROWEB, an online server for protein secondary structure analyses from circular dichroism spectroscopic data. *Nucleic Acids Res* 32(Web Server issue):W668–W673.
7. Whitmore L, Wallace BA (2008) Protein secondary structure analyses from circular dichroism spectroscopy: Methods and reference databases. *Biopolymers* 89(5):392–400.
8. Sreerama N, Woody RW (2000) Estimation of protein secondary structure from circular dichroism spectra: Comparison of CONTIN, SELCON, and CDSSTR methods with an expanded reference set. *Anal Biochem* 287(2):252–260.

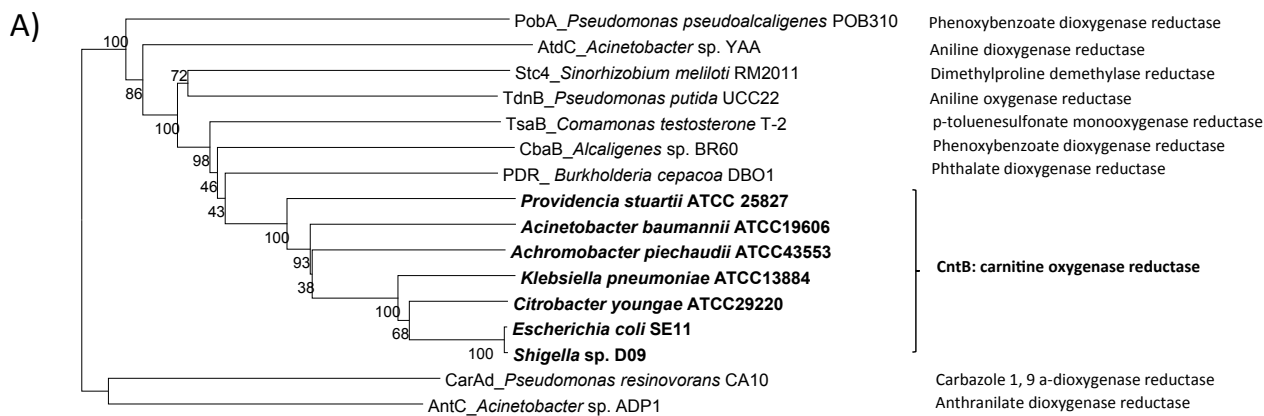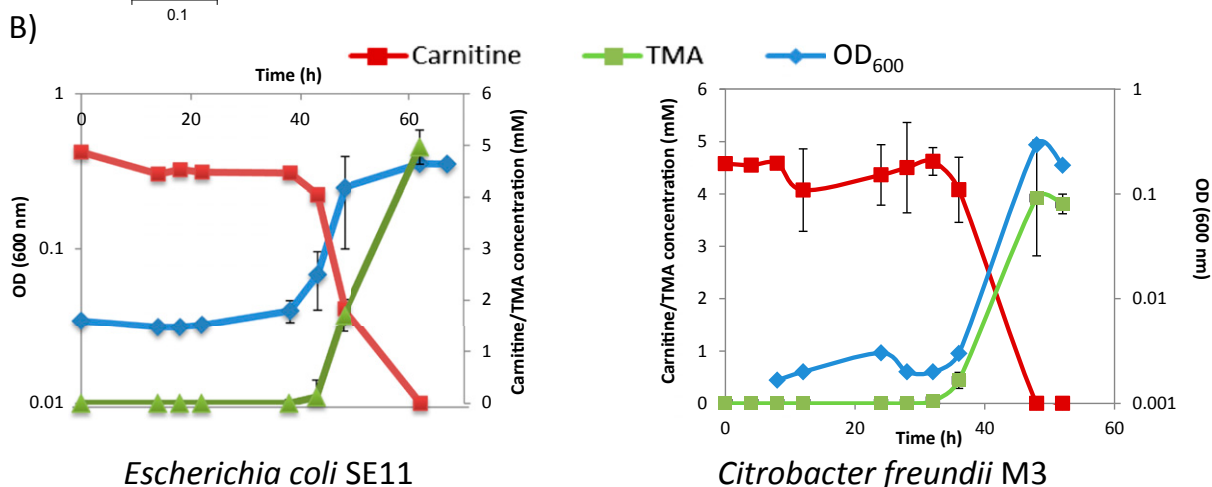

**Fig. S1.** (A) Neighbor joining phylogenetic tree of CntB and other closely related reductase proteins (~320 amino acids). The bar represents one substitution per 10 amino acids. (B) Growth of *E. coli* SE11 and *C. freundii* M3 on carnitine as the sole carbon source and production of TMA. Error bars represent SD of measurements from three biological replicates.

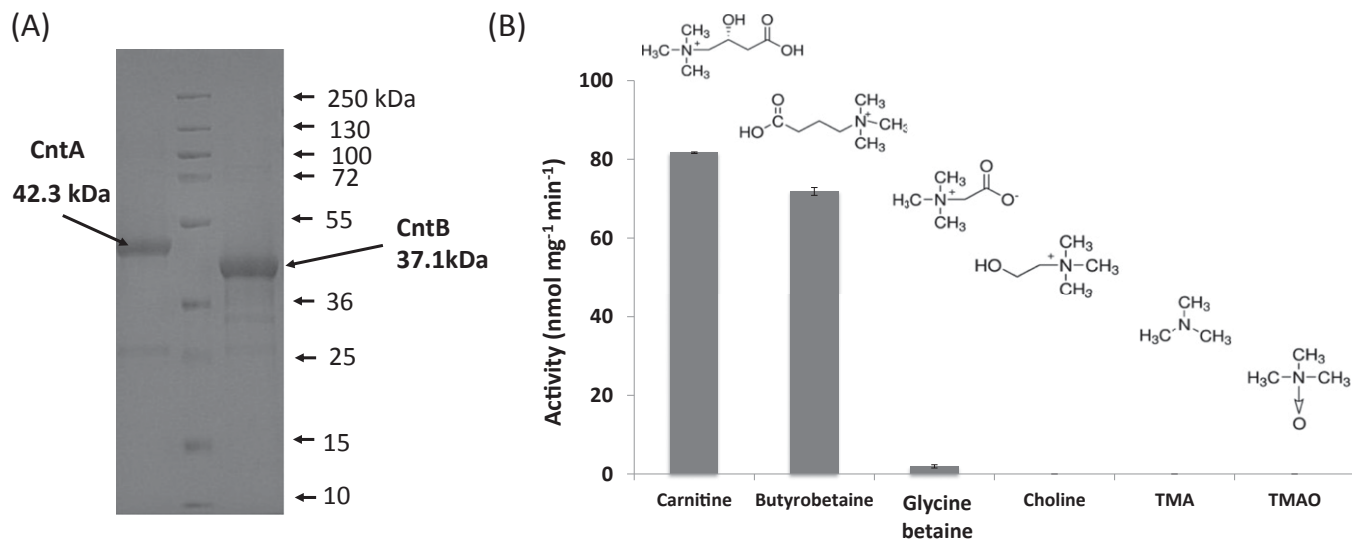

**Fig. S2.** (A) SDS/PAGE analysis of purified CntA and CntB from recombinant *Escherichia coli*. (B) Substrate profile of the purified carnitine oxygenase.

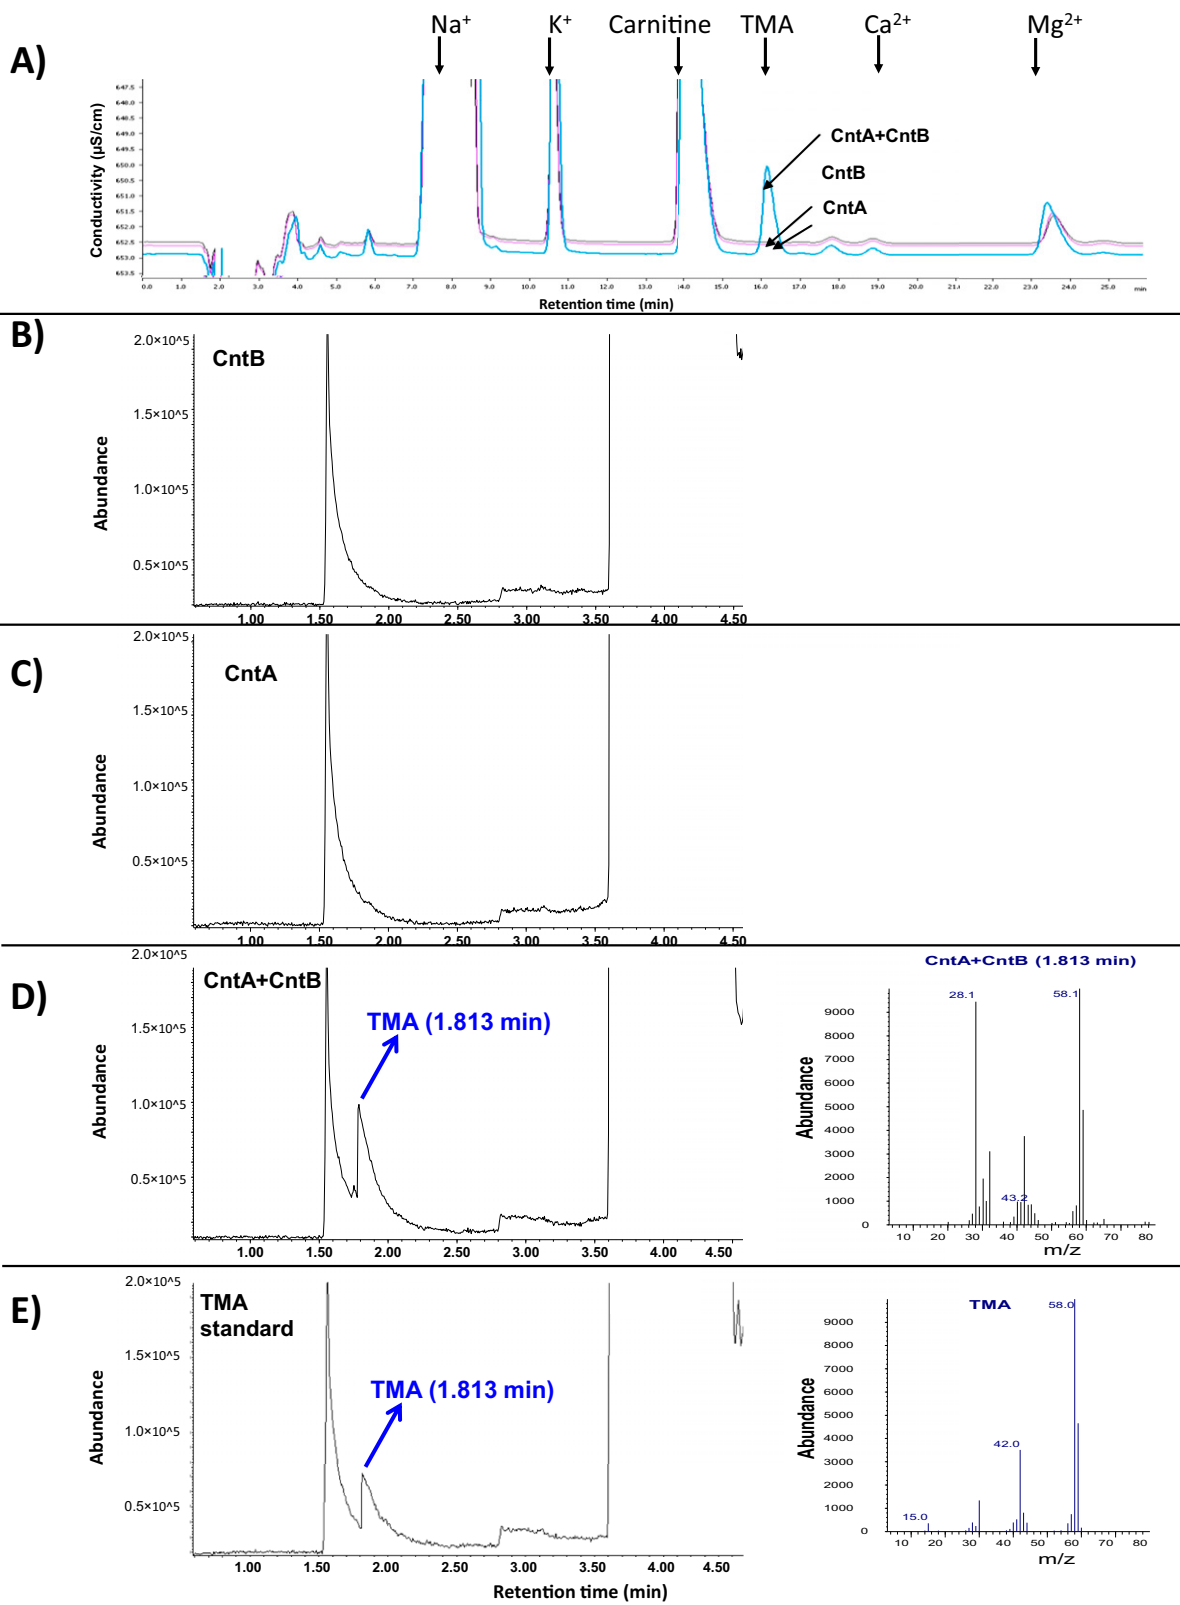

Fig. S3. Ion chromatography quantification (A) and GC-MS identification (B–E) of TMA production from carnitine using purified recombinant CntA alone, CntB alone or CntA+CntB. Mass spectrum of TMA from carnitine oxidation by CntAB were compared with that of authentic TMA standard (shown on D, Right and E, Right, respectively).

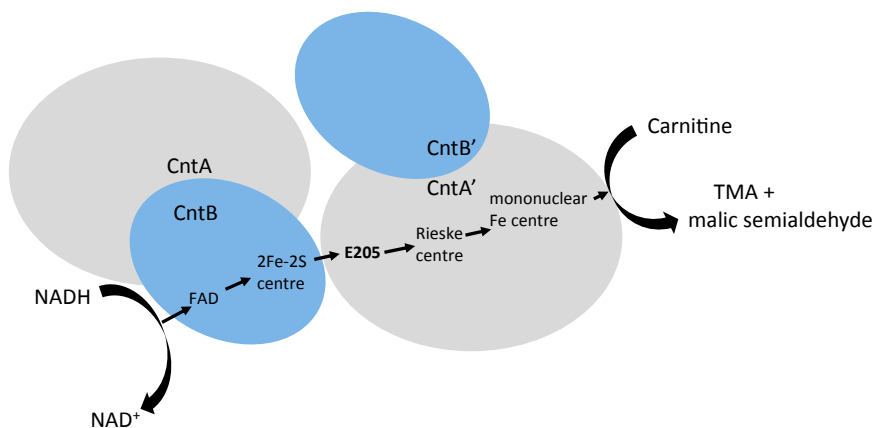

Fig. S4. Proposed electron transfer pathway in CntAB and the role of glutamate 205 in CntA. TMA: trimethylamine; NADH: nicotinamide adenine dinucleotide, reduced.

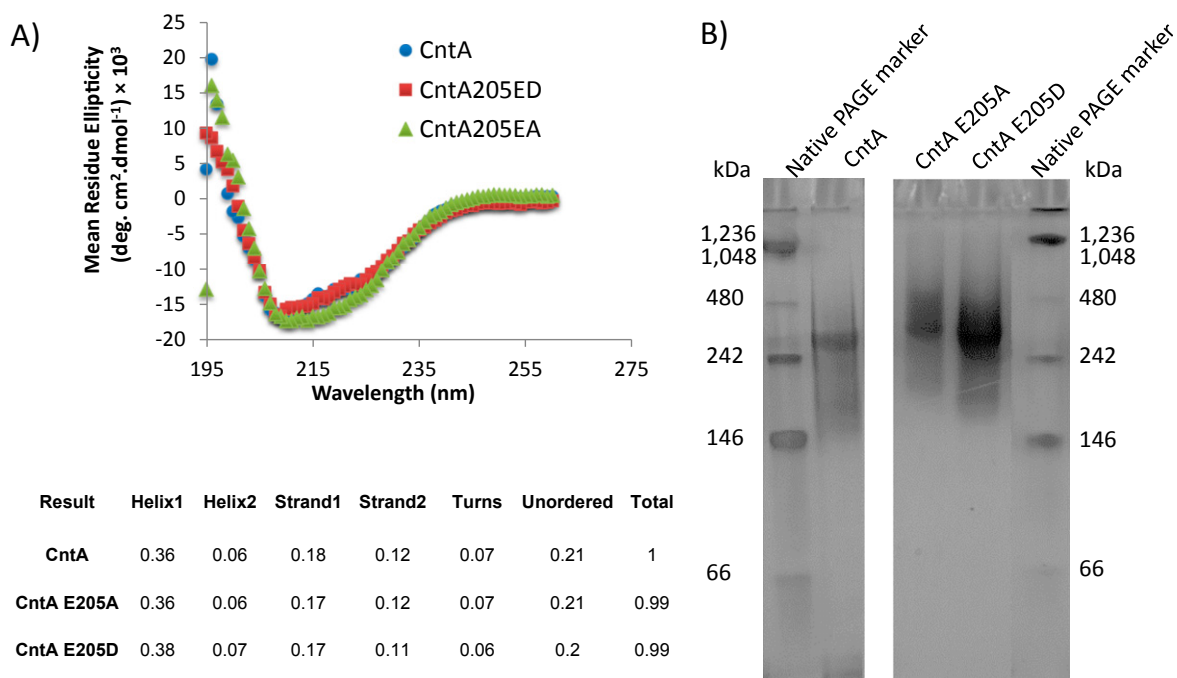

Fig. S5. Characterization of CntA and the site-directed mutants by CD (A) and native-PAGE (B).



Table S1. CaiT homologs in sequenced Human Microbiome Project (HMP) reference genomes

| Locus tag           | Annotation                                                        | Organism                                                       |
|---------------------|-------------------------------------------------------------------|----------------------------------------------------------------|
| GCWU000182_02944    | Choline/carnitine/betaine transport                               | <i>Abiotrophia defectiva</i> ATCC 49176                        |
| HMPREF0004_3863     | Conserved hypothetical protein                                    | <i>Achromobacter piechaudii</i> ATCC 43553                     |
| A60131_010100018802 | Putative transporter                                              | <i>Acinetobacter baumannii</i> 6013113                         |
| A6013_010100011600  | Putative transporter                                              | <i>Acinetobacter baumannii</i> 6013150                         |
| A6014_010100011000  | Putative transporter                                              | <i>Acinetobacter baumannii</i> 6014059                         |
| HMPREF0010_01347    | Betaine/choline/glycine transporter                               | <i>Acinetobacter baumannii</i> ATCC 19606                      |
| HMPREF0014_03271    | Betaine/choline/glycine transporter                               | <i>Acinetobacter</i> sp. RUH2624                               |
| HMPREF0013_01187    | Conserved hypothetical protein                                    | <i>Acinetobacter</i> sp. SH024                                 |
| HMPREF1705_00723    | Osmoprotectant transporter, BCCT family                           | <i>Anaerobaculum hydrogeniformans</i><br>ATCC BAA-1850         |
| HMPREF1013_04206    | OpuD protein                                                      | <i>Bacillus</i> sp. 2_A_57_CT2                                 |
| HMPREF1013_03192    | Hypothetical protein                                              | <i>Bacillus</i> sp. 2_A_57_CT2                                 |
| HMPREF1013_00505    | Glycine betaine transporter                                       | <i>Bacillus</i> sp. 2_A_57_CT2                                 |
| HMPREF1012_02673    | OpuD protein                                                      | <i>Bacillus</i> sp. BT1B_CT2                                   |
| HMPREF0178_03964    | Hypothetical protein                                              | <i>Bilophila</i> sp. 4_1_30                                    |
| HMPREF0179_03321    | BCCT family transporter                                           | <i>Bilophila wadsworthia</i> 3_1_6                             |
| HMPREF0179_00456    | BCCT family transporter                                           | <i>Bilophila wadsworthia</i> 3_1_6                             |
| CAMRE0001_1572      | L-carnitine/ $\gamma$ -butyrobetaine antiporter                   | <i>Campylobacter rectus</i> RM3267, CCUG 20446                 |
| HMPREF9428_01710    | Betaine/carnitine/choline transporter (BCCT) family transporter   | <i>Citrobacter freundii</i> 4_7_47CFAA                         |
| HMPREF9428_02735    | L-carnitine/ $\gamma$ -butyrobetaine antiporter                   | <i>Citrobacter freundii</i> 4_7_47CFAA                         |
| CSAG_01648          | Conserved hypothetical protein                                    | <i>Citrobacter</i> sp. 30_2                                    |
| CSAG_03337          | L-carnitine/ $\gamma$ -butyrobetaine antiporter                   | <i>Citrobacter</i> sp. 30_2                                    |
| CIT292_00938        | Choline/carnitine/betaine transport                               | <i>Citrobacter youngae</i> ATCC 29220                          |
| CIT292_03024        | Choline/carnitine/betaine transport                               | <i>Citrobacter youngae</i> ATCC 29220                          |
| Cbac1_010100004187  | Putative transporter                                              | <i>Clostridiales</i> sp. 1_7_47FAA                             |
| CLOSTASPAR_04953    | Choline-glycine betaine transporter                               | <i>Clostridium asparagiforme</i> DSM 15981                     |
| HMPREF0240_03154    | Glycine betaine transporter                                       | <i>Clostridium</i> sp. D5                                      |
| HMPREF0240_03223    | Putative osmoprotectant transporter, BCCT family                  | <i>Clostridium</i> sp. D5                                      |
| HMPREF0240_01437    | Osmoprotectant transporter, BCCT family                           | <i>Clostridium</i> sp. D5                                      |
| HMPREF0322_04106    | Transporter, betaine/carnitine/choline family                     | <i>Desulfitobacterium hafniense</i> DP7<br>(draft 151 contigs) |
| HMPREF0322_00857    | Transporter, betaine/carnitine/choline family                     | <i>Desulfitobacterium hafniense</i> DP7<br>(draft 151 contigs) |
| HMPREF0322_00862    | Transporter, betaine/carnitine/choline family                     | <i>Desulfitobacterium hafniense</i> DP7<br>(draft 151 contigs) |
| HMPREF9457_03501    | Hypothetical protein                                              | <i>Dorea formicigenerans</i> 4_6_53AFAA                        |
| DORFOR_00040        | Choline/carnitine/betaine transport                               | <i>Dorea formicigenerans</i> ATCC 27755                        |
| EDWATA_03146        | L-carnitine/ $\gamma$ -butyrobetaine antiporter                   | <i>Edwardsiella tarda</i> ATCC 23685                           |
| EDWATA_03147        | L-carnitine/ $\gamma$ -butyrobetaine antiporter                   | <i>Edwardsiella tarda</i> ATCC 23685                           |
| HMPREF0864_03292    | Betaine/carnitine/choline transporter                             | <i>Enterobacteriaceae bacterium</i> 9_2_54FAA                  |
| HMPREF0358_1653     | Possible transporter                                              | <i>Escherichia coli</i> 83972                                  |
| HMPREF9345_01358    | Transporter, betaine/carnitine/choline transporter family protein | <i>Escherichia coli</i> MS 107-1                               |
| HMPREF9345_01115    | Transporter, betaine/carnitine/choline transporter family protein | <i>Escherichia coli</i> MS 107-1                               |
| HMPREF9540_03296    | Transporter, betaine/carnitine/choline transporter family protein | <i>Escherichia coli</i> MS 115-1                               |
| HMPREF9540_01454    | Transporter, betaine/carnitine/choline transporter family protein | <i>Escherichia coli</i> MS 115-1                               |
| HMPREF9541_04721    | Transporter, betaine/carnitine/choline transporter family protein | <i>Escherichia coli</i> MS 116-1                               |
| HMPREF9541_02156    | Transporter, betaine/carnitine/choline transporter family protein | <i>Escherichia coli</i> MS 116-1                               |
| HMPREF9346_01791    | Transporter, betaine/carnitine/choline transporter family protein | <i>Escherichia coli</i> MS 119-7                               |
| HMPREF9346_03001    | Transporter, betaine/carnitine/choline transporter family protein | <i>Escherichia coli</i> MS 119-7                               |
| HMPREF9347_04517    | Transporter, betaine/carnitine/choline transporter family protein | <i>Escherichia coli</i> MS 124-1                               |
| HMPREF9347_03685    | Transporter, betaine/carnitine/choline transporter family protein | <i>Escherichia coli</i> MS 124-1                               |
| HMPREF9348_01357    | Transporter, betaine/carnitine/choline transporter family protein | <i>Escherichia coli</i> MS 145-7                               |
| HMPREF9348_03244    | Transporter, betaine/carnitine/choline transporter family protein | <i>Escherichia coli</i> MS 145-7                               |
| HMPREF9543_02303    | Transporter, betaine/carnitine/choline transporter family protein | <i>Escherichia coli</i> MS 146-1                               |
| HMPREF9543_04874    | Transporter, betaine/carnitine/choline transporter family protein | <i>Escherichia coli</i> MS 146-1                               |
| HMPREF9547_02514    | Transporter, betaine/carnitine/choline transporter family protein | <i>Escherichia coli</i> MS 175-1                               |
| HMPREF9547_02765    | Transporter, betaine/carnitine/choline transporter family protein | <i>Escherichia coli</i> MS 175-1                               |
| HMPREF9548_02982    | Transporter, betaine/carnitine/choline transporter family protein | <i>Escherichia coli</i> MS 182-1                               |
| HMPREF9548_02182    | Transporter, betaine/carnitine/choline transporter family protein | <i>Escherichia coli</i> MS 182-1                               |
| HMPREF9549_02457    | Transporter, betaine/carnitine/choline transporter family protein | <i>Escherichia coli</i> MS 185-1                               |
| HMPREF9550_00256    | Transporter, betaine/carnitine/choline transporter family protein | <i>Escherichia coli</i> MS 187-1                               |
| HMPREF9550_01015    | Transporter, betaine/carnitine/choline transporter family protein | <i>Escherichia coli</i> MS 187-1                               |
| HMPREF9551_02675    | Transporter, betaine/carnitine/choline transporter family protein | <i>Escherichia coli</i> MS 196-1                               |

Table S1. Cont.

| Locus tag            | Annotation                                                        | Organism                                                 |
|----------------------|-------------------------------------------------------------------|----------------------------------------------------------|
| HMPREF9551_02516     | Transporter, betaine/carnitine/choline transporter family protein | <i>Escherichia coli</i> MS 196-1                         |
| HMPREF9552_04960     | Transporter, betaine/carnitine/choline transporter family protein | <i>Escherichia coli</i> MS 198-1                         |
| HMPREF9553_02651     | Transporter, betaine/carnitine/choline transporter family protein | <i>Escherichia coli</i> MS 200-1                         |
| HMPREF9530_04260     | Transporter, betaine/carnitine/choline transporter family protein | <i>Escherichia coli</i> MS 21-1                          |
| HMPREF9530_03696     | Transporter, betaine/carnitine/choline transporter family protein | <i>Escherichia coli</i> MS 21-1                          |
| HMPREF9531_02296     | Transporter, betaine/carnitine/choline transporter family protein | <i>Escherichia coli</i> MS 45-1                          |
| HMPREF9534_01299     | Transporter, betaine/carnitine/choline transporter family protein | <i>Escherichia coli</i> MS 69-1                          |
| HMPREF9534_05004     | Transporter, betaine/carnitine/choline transporter family protein | <i>Escherichia coli</i> MS 69-1                          |
| HMPREF9535_02410     | Transporter, betaine/carnitine/choline transporter family protein | <i>Escherichia coli</i> MS 78-1                          |
| HMPREF9535_04534     | Transporter, betaine/carnitine/choline transporter family protein | <i>Escherichia coli</i> MS 78-1                          |
| HMPREF9536_03463     | Transporter, betaine/carnitine/choline transporter family protein | <i>Escherichia coli</i> MS 84-1                          |
| HMPREF9536_02737     | Transporter, betaine/carnitine/choline transporter family protein | <i>Escherichia coli</i> MS 84-1                          |
| ECSF_0045            | Putative carnitine transporter                                    | <i>Escherichia coli</i> O150:H5 SE15                     |
| ECSE_0041            | Putative carnitine transporter                                    | <i>Escherichia coli</i> SE11                             |
| ECSE_1975            | Putative transport protein                                        | <i>Escherichia coli</i> SE11                             |
| ESCG_01223           | Choline/carnitine/betaine transporter                             | <i>Escherichia</i> sp. 1_1_43                            |
| ESAG_04067           | L-carnitine/ $\gamma$ -butyrobetaine antiporter                   | <i>Escherichia</i> sp. 3_2_53FAA                         |
| E4_010100004119      | Putative transporter                                              | <i>Escherichia</i> sp. 4_1_40B                           |
| E4_010100018447      | L-carnitine/ $\gamma$ -butyrobetaine antiporter                   | <i>Escherichia</i> sp. 4_1_40B                           |
| EUBVEN_02747         | Choline-glycine betaine transporter                               | <i>Eubacterium ventriosum</i> ATCC 27560                 |
| HMPREF0402_02949     | Hypothetical protein                                              | <i>Fusobacterium</i> sp. 12_1B                           |
| HMPREF0454_04935     | L-carnitine/ $\gamma$ -butyrobetaine antiporter                   | <i>Hafnia alvei</i> ATCC 51873                           |
| HOLDEFILI_01730      | Choline/carnitine/betaine transport                               | <i>Holdemania filiformis</i> VPI J1-31B-1, DSM 12042     |
| HMPREF9333_01454     | Hypothetical protein                                              | <i>Johnsonella ignava</i> ATCC 51276                     |
| HMPREF9333_01061     | Hypothetical protein                                              | <i>Johnsonella ignava</i> ATCC 51276                     |
| HMPREF0484_3753      | Conserved hypothetical protein                                    | <i>Klebsiella pneumoniae rhinoscleromatis</i> ATCC 13884 |
| HMPREF0485_02497     | BCCT family betaine/carnitine transporter                         | <i>Klebsiella</i> sp. 1_1_55                             |
| HMPREF1024_01931     | Betaine/carnitine/choline transporter (BCCT) family transporter   | <i>Klebsiella</i> sp. 4_1_44FAA                          |
| HMPREF9538_04403     | Transporter, betaine/carnitine/choline family                     | <i>Klebsiella</i> sp. MS 92-3                            |
| HMPREF0490_01850     | Hypothetical protein                                              | <i>Lachnospiraceae bacterium</i> 6_1_37FAA               |
| HMPREF0987_01668     | Hypothetical protein                                              | <i>Lachnospiraceae bacterium</i> 9_1_43BFAA              |
| HMPREF0531_2425      | BCCT family betaine/carnitine/choline transporter                 | <i>Lactobacillus plantarum</i> ATCC 14917                |
| HMPREF9371_2432      | BCCT family osmoprotectant transporter                            | <i>Neisseria shayegani</i> 871                           |
| HMPREF9370_2231      | BCCT family osmoprotectant transporter                            | <i>Neisseria wadsworthii</i> 9715                        |
| POTG_03408           | Choline/carnitine/betaine transporter                             | <i>Paenibacillus</i> sp. D14                             |
| HMPREF9024_00300     | BCCT family betaine/carnitine transporter                         | <i>Pediococcus acidilactici</i> 7_4                      |
| HMPREF0623_1089      | Glycine betaine/carnitine/choline transporter                     | <i>Pediococcus acidilactici</i> DSM 20284                |
| HMPREF0693_2800      | BCCT family betaine/carnitine/choline transporter                 | <i>Proteus mirabilis</i> ATCC 29906                      |
| PROPEN_01218         | Choline/carnitine/betaine transport                               | <i>Proteus penneri</i> ATCC 35198                        |
| PROVRETT_04514       | Choline/carnitine/betaine transport                               | <i>Providencia rettgeri</i> DSM 1131                     |
| HMPREF9373_0457      | BCCT family betaine transporter                                   | <i>Psychrobacter</i> sp. 1501                            |
| HMPREF9373_1383      | BCCT family betaine/carnitine/choline transporter                 | <i>Psychrobacter</i> sp. 1501                            |
| HMPREF7215_2461      | Glycine betaine transporter OpuD                                  | <i>Pyramidobacter pisciolens</i> W5455                   |
| ShiD9_010100014456   | L-carnitine/ $\gamma$ -butyrobetaine antiporter                   | <i>Shigella</i> sp. D9                                   |
| ShiD9_010100003772   | Putative transporter                                              | <i>Shigella</i> sp. D9                                   |
| HMPREF9372_1646      | BCCT family osmoprotectant transporter                            | <i>Sporosarcina newyorkensis</i> 2681                    |
| HMPREF0782_2136      | BCCT family osmoprotectant transporter                            | <i>Staphylococcus aureus aureus</i> ATCC 51811           |
| HMPREF0783_0859      | BCCT family osmoprotectant transporter                            | <i>Staphylococcus aureus aureus</i> ATCC BAA-39          |
| HMPREF0769_10535     | BCCT family osmoprotectant transporter                            | <i>Staphylococcus aureus aureus</i> MN8                  |
| HMPREF0774_1421      | Choline transporter                                               | <i>Staphylococcus aureus aureus</i> TCH130               |
| HMPREF0772_10576     | BCCT family osmoprotectant transporter                            | <i>Staphylococcus aureus aureus</i> TCH60                |
| HMPREF0773_0708      | Choline transporter                                               | <i>Staphylococcus aureus aureus</i> TCH70                |
| Sauraur_010100002150 | BCCT family betaine/carnitine/choline transporter                 | <i>Staphylococcus aureus aureus</i> USA300_TCH959        |
| HMPREF0786_01385     | Osmoprotectant transporter, BCCT family                           | <i>Staphylococcus caprae</i> C87                         |
| HMPREF0789_1995      | BCCT family betaine/carnitine/choline transporter                 | <i>Staphylococcus epidermidis</i> BCM-HMP0060            |
| HMPREF0793_0722      | BCCT family betaine/carnitine/choline transporter                 | <i>Staphylococcus epidermidis</i> M23864:W1              |
| HMPREF0794_1239      | BCCT family osmoprotectant transporter                            | <i>Staphylococcus epidermidis</i> M23864:W2(gray)        |

**Table S1. Cont.**

| Locus tag        | Annotation                                                               | Organism                                   |
|------------------|--------------------------------------------------------------------------|--------------------------------------------|
| HMPREF0797_0715  | Transporter, betaine/carnitine/choline transporter (BCCT) family protein | <i>Staphylococcus epidermidis</i> SK135    |
| HMPREF0791_2152  | BCCT family betaine/carnitine/choline transporter                        | <i>Staphylococcus epidermidis</i> W23144   |
| HMPREF0798_01170 | Osmoprotectant transporter, BCCT family                                  | <i>Staphylococcus hominis hominis</i> C80  |
| STAH00001_0325   | Choline-glycine betaine transporter                                      | <i>Staphylococcus hominis</i> SK119        |
| HMPREF0790_1708  | BCCT family osmoprotectant transporter                                   | <i>Staphylococcus lugdunensis</i> M23590   |
| STAWA0001_0151   | Osmoprotectant transporter, bcct family                                  | <i>Staphylococcus warneri</i> L37603, SK66 |

In the JGI/IMG-HMP database as of February 2013, 754 HMP reference genomes were available; 122 CaIT homologs were found ( $E \leq -50$ ) in 91 unique genomes.

**Table S2. Putative *cntA* gene in sequenced HMP reference genomes**

| Locus tag           | Annotation                                              | Organism                                                 | Sources of isolation                     |
|---------------------|---------------------------------------------------------|----------------------------------------------------------|------------------------------------------|
| HMPREF0004_3864     | Conserved hypothetical protein                          | <i>Achromobacter piechaudii</i> ATCC 43553               | Nose wound, <i>Homo sapiens</i> , France |
| A60131_010100018812 | Rieske [2Fe-2S] domain protein                          | <i>Acinetobacter baumannii</i> 6013113                   | Human skin                               |
| A6013_010100011610  | Rieske [2Fe-2S] domain protein                          | <i>Acinetobacter baumannii</i> 6013150                   | Human skin                               |
| A6014_010100011010  | Rieske [2Fe-2S] domain protein                          | <i>Acinetobacter baumannii</i> 6014059                   | Human skin                               |
| HMPREF0010_01349    | Dioxygenase $\alpha$ -subunit                           | <i>Acinetobacter baumannii</i> ATCC 19606                | Human urine                              |
| HMPREF0014_03273    | Dioxygenase $\alpha$ -subunit                           | <i>Acinetobacter</i> sp. RUH2624                         | Human skin                               |
| HMPREF0013_01185    | Conserved hypothetical protein                          | <i>Acinetobacter</i> sp. SH024                           | Human skin                               |
| HMPREF9428_01711    | Putative dioxygenase subunit $\alpha$ <i>yeaW</i>       | <i>Citrobacter freundii</i> 4_7_47CFAA                   | Human sigmoid colon                      |
| CSAG_01649          | Rieske domain-containing protein                        | <i>Citrobacter</i> sp. 30_2                              | Human feces                              |
| CIT292_03025        | Ring-hydroxylating dioxygenases, large terminal subunit | <i>Citrobacter youngae</i> ATCC 29220                    | Human feces                              |
| HMPREF9345_01357    | Rieske [2Fe-2S] domain protein                          | <i>Escherichia coli</i> MS 107-1                         | Human gastrointestinal tract             |
| HMPREF9540_01453    | Rieske [2Fe-2S] domain protein                          | <i>Escherichia coli</i> MS 115-1                         | Human intestinal tract                   |
| HMPREF9541_04722    | Rieske [2Fe-2S] domain protein                          | <i>Escherichia coli</i> MS 116-1                         | Human gastrointestinal tract             |
| HMPREF9346_03000    | Rieske [2Fe-2S] domain protein                          | <i>Escherichia coli</i> MS 119-7                         | Human gastrointestinal tract             |
| HMPREF9347_04518    | Rieske [2Fe-2S] domain protein                          | <i>Escherichia coli</i> MS 124-1                         | Human gastrointestinal tract             |
| HMPREF9348_01358    | Rieske [2Fe-2S] domain protein                          | <i>Escherichia coli</i> MS 145-7                         | Human gastrointestinal tract             |
| HMPREF9543_02302    | Rieske [2Fe-2S] domain protein                          | <i>Escherichia coli</i> MS 146-1                         | Human gastrointestinal tract             |
| HMPREF9547_02513    | Rieske [2Fe-2S] domain protein                          | <i>Escherichia coli</i> MS 175-1                         | Human gastrointestinal tract             |
| HMPREF9548_02983    | Rieske [2Fe-2S] domain protein                          | <i>Escherichia coli</i> MS 182-1                         | Human gastrointestinal tract             |
| HMPREF9550_00257    | Rieske [2Fe-2S] domain protein                          | <i>Escherichia coli</i> MS 187-1                         | Human gastrointestinal tract             |
| HMPREF9551_02674    | Rieske [2Fe-2S] domain protein                          | <i>Escherichia coli</i> MS 196-1                         | Human gastrointestinal tract             |
| HMPREF9552_03168    | Rieske [2Fe-2S] domain protein                          | <i>Escherichia coli</i> MS 198-1                         | Human gastrointestinal tract             |
| HMPREF9530_03695    | Rieske [2Fe-2S] domain protein                          | <i>Escherichia coli</i> MS 21-1                          | Human gastrointestinal tract             |
| HMPREF9534_05005    | Rieske [2Fe-2S] domain protein                          | <i>Escherichia coli</i> MS 69-1                          | Human gastrointestinal tract             |
| HMPREF9535_02411    | Rieske [2Fe-2S] domain protein                          | <i>Escherichia coli</i> MS 78-1                          | Human gastrointestinal tract             |
| HMPREF9536_02738    | Rieske [2Fe-2S] domain protein                          | <i>Escherichia coli</i> MS 84-1                          | Human gastrointestinal tract             |
| ECSE_1976           | Putative dioxygenase $\alpha$ subunit                   | <i>Escherichia coli</i> SE11                             | Human gastrointestinal tract             |
| E4_010100004114     | Predicted 2Fe-2S containing protein                     | <i>Escherichia</i> sp. 4_1_40B                           | Human gastrointestinal tract             |
| HMPREF0484_3754     | Conserved hypothetical protein                          | <i>Klebsiella pneumoniae rhinoscleromatis</i> ATCC 13884 | Human airways sample                     |
| HMPREF0485_02496    | Dioxygenase subunit $\alpha$ <i>yeaW</i>                | <i>Klebsiella</i> sp. 1_1_55                             | Human gastrointestinal tract             |
| HMPREF1024_01930    | Hypothetical protein                                    | <i>Klebsiella</i> sp. 4_1_44FAA                          | Human gastrointestinal tract             |
| HMPREF9538_04404    | Rieske [2Fe-2S] domain protein                          | <i>Klebsiella</i> sp. MS 92-3                            | Human gastrointestinal tract             |
| PROVRETT_04639      | Ring-hydroxylating dioxygenases, large terminal subunit | <i>Providencia rettgeri</i> DSM 1131                     | Human feces                              |
| Pstua_020100020983  | Dioxygenase, $\alpha$ -subunit                          | <i>Providencia stuartii</i> ATCC 25827                   | Human gastrointestinal tract             |
| SBO_1286            | Hypothetical protein                                    | <i>Shigella boydii</i> Sb227                             | Epidemic in China in 1950s               |
| SDY_1706            | Hypothetical protein                                    | <i>Shigella dysenteriae</i> Sd197                        | Epidemic in China in 1950s               |
| SSON_1359           | Hypothetical protein                                    | <i>Shigella sonnei</i> Ss046                             | Epidemic in China in 1950s               |
| ShiD9_010100003767  | Predicted 2Fe-2S containing protein                     | <i>Shigella</i> sp. D9                                   | Human gastrointestinal tract             |
| HMPREF9372_1747     | Rieske [2Fe-2S] domain protein                          | <i>Sporosarcina newyorkensis</i> 2681                    | Human blood                              |

In the JGI/IMG-HMP database as of February 2013, 754 HMP reference genomes were available; 39 CntA homologs ( $E \leq -50$ , query sequence: CntA of *A. baumannii* ATCC19606) were found in 39 unique genomes.



**Table S3. Rieske-type proteins used in CntA phylogenetic analyses**

| GenBank or PDB accession no. | Gene         | Enzyme                                 | Organism                             |
|------------------------------|--------------|----------------------------------------|--------------------------------------|
| M64747                       | <i>xylX</i>  | Toluate 1,2-dioxygenase                | <i>Pseudomonas putida</i>            |
| AF071556                     | <i>antA</i>  | Anthranilate dioxygenase               | <i>Acinetobacter</i> sp. ADP1        |
| AF119621                     | <i>ditA</i>  | Abietane diterpenoids oxygenase        | <i>Pseudomonas abietaniphila</i>     |
| AJ223220                     | <i>dxnA</i>  | Dioxin dioxygenase                     | <i>Sphingomonas</i> sp. RW1          |
| 2B1X                         | <i>nahAc</i> | Naphthalene 1,2-dioxygenase            | <i>Rhodococcus</i> sp. NCIMB12038    |
| 2XR8                         | <i>bhpAE</i> | Biphenyl dioxygenase                   | <i>Burkholderia xenovorans</i> Lb400 |
| 1WQL                         | <i>cumA</i>  | Cumene dioxygenase                     | <i>Pseudomonas fluorescens</i> Ip01  |
| 3EN1                         | <i>todC1</i> | Toluene 2,3-dioxygenase                | <i>Pseudomonas putida</i>            |
| 2GBW                         | <i>bphA</i>  | Biphenyl 2,3-dioxygenase               | <i>Sphingomonas yanoikuyae</i> B1    |
| 2CKF                         | <i>pahAc</i> | PAH dioxygenase                        | <i>Sphingomonas</i> sp. Chy-1        |
| 2BMO                         | <i>nbzAC</i> | Nitrobenzene dioxygenase               | <i>Comamonas</i> sp. JS765           |
| 1O7W                         | <i>nahAc</i> | Naphthalene 1,2-dioxygenase            | <i>Pseudomonas putida</i>            |
| 2ZYL                         | <i>kshA</i>  | 3-ketosteroid-9- $\alpha$ -hydroxylase | <i>Mycobacterium tuberculosis</i>    |
| 1Z02                         | <i>oxoO</i>  | 2-oxoquinoline 8-monooxygenase         | <i>Pseudomonas putida</i>            |
| 1WW9                         | <i>carA</i>  | Carbazole 1, 9 a-dioxygenase           | <i>Janthinobacterium</i> sp. J3      |
| 3GKE                         | <i>dmo</i>   | Dicamba monooxygenase                  | <i>Stenotrophomonas maltophilia</i>  |
| Q44256                       | <i>cbaA</i>  | 3-chlorobenzoate-3,4-dioxygenase       | <i>Comamonas testosteroni</i>        |
| 3VCP                         | <i>stc2</i>  | Dimethylproline demethylase            | <i>Sinorhizobium meliloti</i> RM2011 |
| AAG08795                     | <i>gbcA</i>  | Glycine betaine demethylase            | <i>Pseudomonas aeruginosa</i>        |
| U85780                       | <i>cmo</i>   | Choline monooxygenase                  | <i>Spinacia oleracea</i>             |
| AB303389                     | <i>cmo</i>   | Choline monooxygenase                  | <i>Amaranthus tricolor</i>           |
| CAE17671                     | <i>cmo</i>   | Choline monooxygenase                  | <i>Oryza sativa</i>                  |

**Table S4. Bacterial strains and plasmids used in this study**

| Strains and plasmids                         | Description, genotype, relevant characteristics                                                                         | Source                                        |
|----------------------------------------------|-------------------------------------------------------------------------------------------------------------------------|-----------------------------------------------|
| <i>Acinetobacter baumannii</i><br>ATCC 19606 |                                                                                                                         | University of Leicester laboratory collection |
| $\Delta cntA::aacC1$                         | ATCC 19606 derivative with <i>cntA</i> deletion                                                                         | Present study                                 |
| $\Delta cntB::aacC1$                         | ATCC 19606 derivative with <i>cntB</i> deletion                                                                         | Present study                                 |
| <i>Escherichia coli</i><br>JM109             | General cloning                                                                                                         | Promega                                       |
| BLR(DE3)pLysS                                | Heterologous expression of <i>cntA/cntB</i> under the T7 promoter                                                       | Novagen                                       |
| CC118 $\lambda$ pir                          | $\Delta(ara-leu) araD \_lacX74 galE galK phoA thi-1 rpsE rpoB argE(Am) recA1$ ; lysogenized with $\lambda$ pir phage    | Simon et al. (1)                              |
| S17- $\lambda$ pir                           | <i>hsdR recA pro</i> RP4-2 (Tc::Mu; $K_m::Tn7$ )( $\lambda$ pir)                                                        | Simon et al. (1)                              |
| Plasmids                                     |                                                                                                                         |                                               |
| pET28a                                       | For overexpression of <i>cntA</i> and its mutants (E205D, E205A)                                                        | Novagen                                       |
| pCOLADuet-1                                  | For coexpression of <i>cntA</i> and <i>cntB</i>                                                                         | Novagen                                       |
| pJTOOL-3                                     | Suicide vector for <i>Acinetobacter baumannii</i> , R6K <i>ori mobRP4 sacB</i> ; Cm <sup>R</sup>                        | van Aartsen and Rajakumar (2)                 |
| pUC18R6K-mini-Tn7T-Gm                        | Source of gentamicin cassette                                                                                           | Choi et al. (3)                               |
| pKR609                                       | pJTOOL-3:: $\Delta cntA$ -GM 5                                                                                          | Present study                                 |
| pKR612                                       | pJTOOL-3:: $\Delta cntB$ -GM 22                                                                                         | Present study                                 |
| pMQ300                                       | For complementation of $\Delta cntA$ and $\Delta cntB$ mutants; Hph <sup>R</sup> ; pBBR1 <i>ori, oriT</i> , URA3 marker | Kalivoda et al. (4)                           |
| pKR706                                       | The 7.8 kb carnitine oxygenase gene cluster cloned into the BamHI/KpnI sites of pMQ300                                  | Present study                                 |

- Simon R, Prifer U, Pühler A (1983) A broad host range mobilization system for *in vivo* genetic engineering: Transposon mutagenesis in gram negative bacteria. *Bio/Technology* 1(9):784–791.
- van Aartsen JJ, Rajakumar K (2011) An optimized method for suicide vector-based allelic exchange in *Klebsiella pneumoniae*. *J Microbiol Methods* 86(3):313–319.
- Choi KH, et al. (2005) A Tn7-based broad-range bacterial cloning and expression system. *Nat Methods* 2(6):443–448.
- Kalivoda EJ, et al. (2011) New vector tools with a hygromycin resistance marker for use with opportunistic pathogens. *Mol Biotechnol* 48(1):7–14.
